## **Protocol on an Integrative review on nomenclature and outcomes in paediatric complex critical illness - The basis for consensus definition.**

**Authors** Sofia Cuevas-Asturias<sup>1</sup>, Will Tremlett<sup>2</sup>, Hannah Mitchell<sup>3</sup>, Padmanabhan Ramnarayan<sup>1</sup>, Natalie Pattison<sup>1</sup>

1. Imperial College London

2. Birmingham Childrens hospital

3. Institute of Child Health, University College London, London, UK

### **Abstract**

Paediatric Critical Care (PCC) supports the recovery of children with severe illness. Nationally, there are 30 PCC units with a total of approximately 400 beds. There is constant demand for these beds with an average five-day length of stay and admissions increasing at a greater rate than age-specific population growth[1, 2]. Prolonged stay patients account for approximately half of all PCC patient bed days[3].

Complex critically ill (CCI) patients need input from multiple different teams alongside support for their family [4, 5]. CCI patients often become prolonged PCC-stay patients too [6]. Internationally, there is variation in the definition of CCI patients [4, 8], this creates service variation and tensions around what resources can be provided and how quickly to support home discharge.

**Objective:** The face of Paediatric Critical Care, in the UK and internationally has changed over the course of the last ten years with a growing cohort of complex critically ill patients. This integrative review aims to look at current nomenclature, definitions, and outcome measures of priority in this undefined patient population.

**Inclusion criteria:** All types of studies looking at complex critically ill children (age<18 years) admitted to any paediatric intensive care unit (PICU).

**Methods:** The review will be registered on Prospero. Medline, Embase, Maternity and Infant care, The Cochrane library, the Cumulative Index to Nursing and Allied Health literature (CINAHL), Web of Science, and NHS evidence will be searched from 2014 to April 2024.

Search limits will include all languages, exclude the setting of neonatal intensive care and age>18 years old. Four independent authors will screen citations for eligible studies and perform data extraction. The final search strategy will be developed in Medline and peer-reviewed by a health research librarian not involved in the study. This will be then translated to other databases as appropriate.

Author approval: All authors have seen and approved the manuscript

Competing Interests: None



## Background

Paediatric Critical Care (PCC) has 30 units throughout the UK, with a total of approximately 400 beds[2]. The overall occupancy of PCC beds runs critically high around >85% most of the year and studies have shown an increasing demand for PCC beds with concern that demand may soon outstrip resources[2]. One reason for increasing demand is greater numbers of a heterogeneous group of complex critical illness (CCI) children often prolonged lengths of stay. Existing classification systems of CCI patients are variable and do not allow for accurate documentation of incidence, epidemiology, mortality, or morbidity[9].

Definition for a prolonged length of stay (PLOS) PCC admission varies from >14 to >28 days. Over the last two decades, PLOS PICU admissions have increased significantly and now account for between 42-51% of PICU patient-days [3]. PLOS PICU patients have a high resource utilisation and a median overall hospital length of stay of 98 days. PCC has a decreasing overall trend in mortality, but PLOS patients have significantly higher mortality than the general PICU population[3, 10].

### **Children with complex critical illness (CCI)**

CCI patients present unique challenges to PCC. These challenges include:

- (Frequently) prolonged length of stay
- Complex medical regimens
- Complicated family dynamics
- Multiple specialist and allied healthcare professional (AHP) input amongst others.

A national survey published in 2024 with the Paediatric Critical Care Society Study Group (PCCS-SG) looked at provision for CCI patients. This showed variable patient identification, management, and care pathways[4]. Currently, there are two PCC units in the UK with a specific multidisciplinary toolkit for the management of CCI patients[4]. Due to a lack of definition for CCI patients, paediatric critical care does not know the economic impact, mortality, or morbidity of this patient group. Alongside this, CCI patients have unknown outcomes and no standardised management pathways.

This integrative review will provide a detailed analysis of evidence around nomenclature, definitions of this patient cohort alongside outcomes of measurement. This will aid the development of a definition via a consensus group.

A preliminary search of MEDLINE, Cochrane database of systematic reviews, COMET initiative, Prospero and JBI Evidence Synthesis was conducted and no current or underway systematic reviews or integrative reviews on the topic were identified. Zorko et al conducted a scoping review in January 2023 which looked at Chronic critical illness within PICU[11], this differs as it does not encompass medical complexity at admission or repeated admissions.

The objective of this integrative review is to assess the extent of the literature within paediatric complex critical illness and associated outcomes of priority to aid the development of a definition and core outcomes set for this patient group.

## Research question.

This integrative review will aim to answer the following questions:

1. How is paediatric complex critical illness defined in current literature? As there is no current standard of this definition, this review will evaluate how medical complexity, chronic critical illness and prolonged PICU admissions have been defined.
2. What are the demographics and clinical characteristics of complex critical illness patients in PICU based on existing definitions?
3. Health outcomes of interest – what are the outcomes studied currently in this patient group?

The purpose of the integrative study is to use this knowledge to develop a pragmatic consensus definition. With this definition, a core outcomes data set will be developed for the UK.

## Keywords

**Complex critical illness; Paediatric intensive care; children with medical complexity; severe chronic illness; PICU.**

## Eligibility criteria

### Population

Studies looking at critically ill children (age<18 years) admitted to any paediatric intensive care unit (PICU) identified with the following terms:

- Paediatric complex critical illness
- Complex chronic conditions in PICU
- Prolonged or long-stay PICU admission
- Medical complexity in PICU
- Severe or chronic critical illness in PICU
- Severe neurologic impairment in PICU
- Technology dependent children

These have been adapted from Edwards 2022 paper as per Table 1 below.

Table 1: Common Classifications of Children with Severe Chronic Illness and Their Illnesses (taken from Edwards et al. PCCM 2022)[9, 12]

| Classification                          | Commonly Accepted Definition                                                                                                                                                                                                                                                                         |
|-----------------------------------------|------------------------------------------------------------------------------------------------------------------------------------------------------------------------------------------------------------------------------------------------------------------------------------------------------|
| <b>CCC (complex chronic condition)</b>  | Any medical condition that can be expected to last at least 12 months (unless death intervenes) and to involve either several different organ systems or one organ system severely enough to require specialty paediatric care and probably some period of hospitalisation in a tertiary care centre |
| <b>Children with medical complexity</b> | Those with: 1) chronic conditions (specifically of the more severe or CCC type); 2) substantial                                                                                                                                                                                                      |

|                                       |                                                                                                                                                                                                                                                                                                                                                                                                                                                                  |
|---------------------------------------|------------------------------------------------------------------------------------------------------------------------------------------------------------------------------------------------------------------------------------------------------------------------------------------------------------------------------------------------------------------------------------------------------------------------------------------------------------------|
|                                       | functional limitations; 3) increased health and other service needs; and 4) increased healthcare costs                                                                                                                                                                                                                                                                                                                                                           |
| <b>CCI (chronic critical illness)</b> | Conditions in which children have 1) have been hospitalised > 28 days in a neonatal ICU or > 14 in a PCC or who have had a prolonged ICU stay (not defined) and two or more subsequent admissions (PCC or general ward) and 2) have ongoing dependence on technologies to sustain vital functions (Note: CCI was appropriated from adult medicine, where the term has a much longer history and is accepted as a syndrome with characteristic clinical features) |
| <b>Severe neurologic impairment</b>   | CNS disorders that arise in childhood resulting in motor and cognitive impairment and medical complexity, where much assistance is required with activities of daily living. The impairment is permanent and can be progressive or static (Note: There is wide variation in the meaning of this term.)                                                                                                                                                           |
| <b>Technology dependent children</b>  | Those who need both a medical device to compensate for the loss of a vital body function and substantial and ongoing nursing care to avert death or further disability (Note: There is wide variation in the meaning of this term)                                                                                                                                                                                                                               |

**Intervention, Comparator, Outcome:** Any or none. Outcomes will be identified using the COMET theoretical framework to guide the development of a core outcomes set alongside definition development.

### Concept

The concept is the intersection between acute and chronic illness in this population and their associated outcome measures.

### Context

Studies within paediatric intensive care. We will be conducting an international integrative review looking at PICU CCI worldwide. However, this will be to look specifically at the development of a definition within the UK.

Exclusions: The study evaluates only adult population or evaluates adults and paediatric populations but does not report separate data for each population.

### Types of Sources

This integrative review will consider experimental studies, randomised controlled trials, non-randomised controlled trials, before and after studies and interrupted time-series studies. In addition, analytical

observational studies including prospective and retrospective cohort studies, case-control studies and analytical cross-sectional studies will be considered for inclusion. This review will also consider descriptive observational study designs including case series, individual case reports and descriptive cross-sectional studies for inclusion. Qualitative studies will also be considered that focus on qualitative data including, but not limited to, designs such as grounded theory, ethnography, qualitative description, and action research.

In addition, systematic reviews that meet the inclusion criteria will also be considered, depending on the research question. Text and opinion papers will also be considered for inclusion in this integrative review.

## Methods

The protocol was developed using integrative review published methodology[13-17]. An accurate audit trail will be kept to allow for reproducibility[16]. The integrative review will be registered on Prospero. The proposed integrative review will be reported with guidance from the standards of the Preferred Reporting Items for Systematic Review and Meta-analysis (PRISMA) Statement.

### Search strategy.

The search strategy will aim to locate both published and unpublished studies. An initial limited search of Ovid MEDLINE will be done to identify articles on the topic. The text words contained in the titles and abstracts of relevant articles, and the index terms used to describe the articles were used to develop a full search strategy for The Cochrane library, the Cumulative Index to Nursing and Allied Health literature (CINAHL), maternity and infant care, MEDLINE, EMBASE, Web of Science, and NHS evidence (see Appendix 1).

The search strategy, including all identified keywords and index terms, will be adapted for each included database and/or information source. The reference list of all included sources of evidence will be screened for additional studies.

Ongoing consultation with a health librarian will aid specificity and comprehensiveness of the search. Each search strategy will be within the Prospero registration appendix to allow another reviewer the ability to replicate and/or evaluate the search. Studies published since 2014 will be included as complex critical illness is a relatively novel concept within paediatric critical care.

### Study/Source of Evidence selection.

Following the search, all identified citations will be collated and uploaded into Covidence and duplicates removed. Following a pilot test, titles and abstracts will then be screened by three independent reviewers for assessment against the inclusion criteria. All sampling decisions will be transparent and justified with a PRISMA search flow diagram[17].

The full text of selected citations will be assessed in detail against the inclusion criteria by two or more independent reviewers. Reasons for exclusion of sources of evidence at full text review that do not meet the inclusion criteria will be recorded and reported in the integrative review. The search results and study inclusion process will be reported in full in the final integrative review and presented in a Preferred Reporting Items for Systematic Reviews and Meta-analyses (PRISMA) flow diagram[7].

## Data Extraction

Data will be extracted from papers included in the integrative review by three independent reviewers using the systematic review software tool Covidence. The data extracted will include specific details about the participants, concept, context, study methods and key findings relevant to this integrative review.

A draft extraction form is provided (See Appendix 3). The draft data extraction tool will be modified as required during each data extraction process. Modifications will be detailed in the integrative review. Any disagreements that arise between the reviewers will be resolved through discussion, or with an additional reviewer/s. If appropriate, authors of papers will be contacted to request missing or additional data, where required. Critical appraisal of individual sources of evidence will be done.

## Quality assessment

Eight studies (four quantitative and four qualitative studies) will be randomly picked to refine the CASP scoring criteria by all four reviewers. Consistencies and inconsistencies between reviewers will be noted, alongside this, the scoring system will be modified according to problems encountered.

Data will also be clustered geographically into related subgroups to identify themes whilst maintaining a detailed audit trail. A narrative summary will accompany the tabulated results and will describe how the results relate to the reviews objectives and questions. We will consider conducting a sensitivity analysis for qualitative studies.

## Data synthesis

The quality and validity of studies selected will be assessed using the critical appraisal skills programme checklists (CASP) to mitigate bias. The evidence will be presented in a review table with quality scores for each source incorporated into the data table under a column heading that identifies the method of evaluation used. All reviewers will be involved in the quality evaluation.

Quantitative data will be pooled statistically if there is sufficient available data for meta-analysis. If statistical pooling is not possible, the findings will be presented in narrative form. Data will also be clustered geographically into related subgroups to identify themes whilst maintaining a detailed audit trail. A narrative summary will accompany the tabulated results and will describe how the results relate to the reviews objectives and questions.

Analysis of the findings will include identifying strengths and weaknesses of the current literature regarding defining complex critical patients and core outcomes. Synthesis of the findings will provide new understandings of this topic to form a basis for consensus definition development and core outcomes set [15].

## Outcomes

The main outcome of the research will provide an evidence base to inform and influence development of a definition for paediatric complex critical illness. As there is no current standard of this definition, this review will evaluate how medical complexity, chronic critical illness and prolonged PICU admissions have been defined. We will also look at how the definition was developed and/or validated by primary study.

Following this, the findings of this review will be used to inform a future programme of research aimed at improving the identification, management, and outcomes of paediatric complex critical illness patients.

Additional outcomes will be any objective measure of outcomes including:

- Health related outcomes using validated tools where possible (e.g. functional status, severity of illness, co-morbidities, quality of life, symptom burden, unmet needs, satisfaction, rates of hospitalisation)
- Process outcomes (e.g. patient behavioural uptake, quality of care, training, and education; costs and resource utilisation).

Interventions will be pooled to look at common attributes and potential benefits/shortfalls to aid in development of core outcomes set for this population group.

The new knowledge produced may contribute to education and training of undergraduate and postgraduate paediatric intensive care multidisciplinary health professionals and allied health and social care professionals.

We aim to publish the protocol and integrative review findings academic paediatric critical care literature to ensure that findings are internationally available to practitioners and researchers.

## Patient and Public Involvement

This protocol was developed with public and patient involvement. They were involved from first principal onwards. The research questions were informed from previous patient engagement in PICU. They have commented on the methods and have been integral to protocol finalisation. They will continue to be involved in future work using the integrative review for development of a definition for complex critical patients in PICU. They will also aid in dissemination through patient and public networks within complex critical patients.

## Discussion and Conclusion

The discussion will include comparisons, and contrasts of the findings of the review with background literature. Recommendations and implications for future research practice, core outcomes set and consensus definition working group development will be made.

## Funding

No funding

## Conflicts of interest

There is no conflict of interest in this project.



## Appendix 1: Search Strategies

### For Medline:

1. exp Critical Care/
2. exp Intensive Care Units, Pediatric/
3. exp Intensive Care Units, Pediatric/
4. PICU.mp.
5. ((p?ediatric or child\*) and (intensive or ICU)).mp. [mp=title, book title, abstract, original title, name of substance word, subject heading word, floating sub-heading word, keyword heading word, organism supplementary concept word, protocol supplementary concept word, rare disease supplementary concept word, unique identifier, synonyms, population supplementary concept word, anatomy supplementary concept word]
6. p?ediatric critical care.mp.
7. exp adolescent/ or exp child/
8. (child\* or teen\* or infant\* or adolescen\* or p?ediatric).mp. [mp=title, book title, abstract, original title, name of substance word, subject heading word, floating sub-heading word, keyword heading word, organism supplementary concept word, protocol supplementary concept word, rare disease supplementary concept word, unique identifier, synonyms, population supplementary concept word, anatomy supplementary concept word]
9. exp Chronic Disease/
10. chronic disease\*.mp. [mp=title, book title, abstract, original title, name of substance word, subject heading word, floating sub-heading word, keyword heading word, organism supplementary concept word, protocol supplementary concept word, rare disease supplementary concept word, unique identifier, synonyms, population supplementary concept word, anatomy supplementary concept word]
11. (complex adj3 need\*1).mp. [mp=title, book title, abstract, original title, name of substance word, subject heading word, floating sub-heading word, keyword heading word, organism supplementary concept word, protocol supplementary concept word, rare disease supplementary concept word, unique identifier, synonyms, population supplementary concept word, anatomy supplementary concept word]
12. (complex adj2 condition\*).mp. [mp=title, book title, abstract, original title, name of substance word, subject heading word, floating sub-heading word, keyword heading word, organism supplementary concept word, protocol supplementary concept word, rare disease supplementary concept word, unique identifier, synonyms, population supplementary concept word, anatomy supplementary concept word]
13. life-limiting.mp.
14. exp Disabled Children/
15. medical complexity.mp.
16. ((handicap\* adj2 child\*) or disabled child\*).mp. [mp=title, book title, abstract, original title, name of substance word, subject heading word, floating sub-heading word, keyword heading word, organism supplementary concept word, protocol supplementary concept word, rare disease supplementary concept word, unique identifier, synonyms, population supplementary concept word, anatomy supplementary concept word]
17. 1 or 2 or 3 or 4 or 5 or 6
18. 7 or 8
19. chronic illness.mp.
20. Long-term illness.mp.
21. Chronic health condition.mp.

22. Chronic disorder.mp.
23. Technology-Dependent Child\*.mp.
24. 9 or 10 or 11 or 12 or 13 or 14 or 15 or 16 or 19 or 20 or 21 or 22 or 23
25. 17 and 18 and 24
26. limit 25 to yr="2014 -Current"

### For Embase:

1. exp intensive care/
  2. Critical Care.mp.
  3. exp Intensive Care Units, Pediatric/
  4. PICU.mp.  
((p?ediatric or child\*) and (intensive or ICU)).mp. [mp=title, abstract, heading word, drug trade name, original title, device manufacturer, drug manufacturer, device trade name, keyword heading word, floating subheading word, candidate term word]
  5. p?ediatric critical care.mp.
  6. 1 or 2 or 3 or 4 or 5 or 6
  7. child/  
(child\* or teen\* or infant\* or adolescen\* or p?ediatric).mp. [mp=title, abstract, heading word, drug trade name, original title, device manufacturer, drug manufacturer, device trade name, keyword heading word, floating subheading word, candidate term word]
  8. 8 or 9 or 10
  9. exp chronic disease/
  10. Chronic Disease.mp.  
(complex adj3 need\*1).mp. [mp=title, abstract, heading word, drug trade name, original title, device manufacturer, drug manufacturer, device trade name, keyword heading word, floating subheading word, candidate term word]
  11. (complex adj2 condition\*).mp. [mp=title, abstract, heading word, drug trade name, original title, device manufacturer, drug manufacturer, device trade name, keyword heading word, floating subheading word, candidate term word]
  12. life-limiting.mp.
  13. exp disabled child/
  14. exp handicapped child/
  15. Disabled Child\*.mp.
  16. medical complexity.mp.  
(handicap\* adj2 child\*).mp. [mp=title, abstract, heading word, drug trade name, original title, device manufacturer, drug manufacturer, device trade name, keyword heading
  - 17.
-

word, floating subheading word, candidate term word]

22. chronic illness.mp.
  23. Long-term illness.mp.
  24. Chronic health condition.mp.
  25. Chronic disorder.mp.
  26. Technology-Dependent Child\*.mp.
  27. 12 or 13 or 14 or 15 or 16 or 17 or 18 or 19 or 20 or 21 or 22 or 23 or 24 or 25 or 26
  28. 7 and 11 and 27
  29. limit 28 to yr="2014 -Current"
-

## Appendix 2: Draft data extraction form

| Source                                              | Eligibility                     | Study Characteristics           | Methods                          | Patient Demographics                                                      | Miscellaneous                                                       |                                                                                                    |
|-----------------------------------------------------|---------------------------------|---------------------------------|----------------------------------|---------------------------------------------------------------------------|---------------------------------------------------------------------|----------------------------------------------------------------------------------------------------|
| <b>Source</b>                                       | <b>Eligibility</b>              | <b>Study Characteristics</b>    | <b>Methods</b>                   | <b>Patient Demographics</b>                                               | <b>Definition of population, findings and outcomes of interest</b>  | <b>Miscellaneous</b>                                                                               |
| <b>Study ID (created by review author).</b>         | Confirm eligibility for review. | Author name                     | Study design.                    | Total number and groups if applicable                                     | How is the study population defined.                                | Funding source.                                                                                    |
| <b>Review author ID (created by review author).</b> | Reason for exclusion            | Title                           | Total study duration.            | Reason for PICU admission                                                 | Definition of paediatric complex critical illness                   | Key conclusions of the study authors.                                                              |
| <b>Citation and contact details.</b>                |                                 | Country of origin               | Sequence generation.             | Diagnostic criteria.                                                      | Definition of prolonged PICU admission                              | Miscellaneous comments from the study authors.                                                     |
|                                                     |                                 | Journal and year of publication | Allocation sequence concealment. | Age.                                                                      | Definition of medical complexity in PICU                            | References to other relevant studies.                                                              |
|                                                     |                                 | Clinical setting/type of PICU   | Blinding.                        | Sex.                                                                      | How the definition was developed and/or validated by primary study. | Correspondence required.                                                                           |
|                                                     |                                 |                                 | Other concerns about bias*.      | Functional status (using validated tools such as functional status score) | Severity of illness (using validated tools)                         | <i>For each outcome of interest:</i><br>Outcome definition (with diagnostic criteria if relevant). |
|                                                     |                                 |                                 |                                  | Co-morbidity                                                              | Unit of measurement (if relevant).                                  |                                                                                                    |

## References

1. Peter, D., et al., *Increasing admissions to paediatric intensive care units in England and Wales: more than just rising a birth rate*. Archives of Disease in Childhood, 2018. **103**(4): p. 341.
2. Kenny, S.E., *GIRFT Programme National Specialty Report*, P.G.S.a. Urology, Editor. 2021.
3. Kanthimathinathan, H.K., et al., *Trends in long-stay admissions to a UK paediatric intensive care unit*. Arch Dis Child, 2020. **105**(6): p. 558-562.
4. Cuevas-Asturias, S., et al., *A national survey of current practice on patients with long term and additional needs in paediatric intensive care units*. Nursing in Critical Care. **n/a**(n/a).
5. Edwards, J.D., et al., *Continuity Strategies for Long-Stay PICU Patients: Consensus Statements From the Lucile Packard Foundation PICU Continuity Panel*. Pediatric Critical Care Medicine, 2023. **24**(10).
6. Matsumoto, N., et al., *Long-term mortality and functional outcome after prolonged paediatric intensive care unit stay*. Eur J Pediatr, 2019. **178**(2): p. 155-160.
7. Tricco, A.C., et al., *PRISMA Extension for Scoping Reviews (PRISMA-ScR): Checklist and Explanation*. Ann Intern Med, 2018. **169**(7): p. 467-473.
8. Gallegos, C. and N. Cacchillo, *Experiences of Parents of Children With Medical Complexity in the Pediatric Intensive Care Unit: A Scoping Review*. Crit Care Nurse, 2023. **43**(4): p. 20-28.
9. Edwards, J.D. and D.M. Goodman, *The Child With Severe Chronic Illness in the ICU: A Concise Review*. Critical Care Medicine, 2022. **50**(5): p. 848-859.
10. Kahn, J.M., et al., *The epidemiology of chronic critical illness in the United States\**. Crit Care Med, 2015. **43**(2): p. 282-7.
11. Zorko, D.J., et al., *Defining Pediatric Chronic Critical Illness: A Scoping Review\**. Pediatric Critical Care Medicine, 2023. **24**(2): p. e91-e103.
12. Edwards, J.D. and D.M. Goodman, *The Child With Severe Chronic Illness in the ICU: A Concise Review*. Crit Care Med, 2022. **50**(5): p. 848-859.
13. Moher, D., et al., *Preferred reporting items for systematic review and meta-analysis protocols (PRISMA-P) 2015 statement*. Systematic Reviews, 2015. **4**(1): p. 1.
14. Whitemore, R. and K. Knaf, *The integrative review: updated methodology*. Journal of Advanced Nursing, 2005. **52**(5): p. 546-553.
15. Oermann, M.H. and K.A. Knaf, *Strategies for completing a successful integrative review*. Nurse Author & Editor, 2021. **31**(3-4): p. 65-68.
16. Kutcher, A.M. and V.T. LeBaron, *A simple guide for completing an integrative review using an example article*. Journal of Professional Nursing, 2022. **40**: p. 13-19.
17. Toronto, C.E., *Overview of the Integrative Review*, in *A Step-by-Step Guide to Conducting an Integrative Review*, C.E. Toronto and R. Remington, Editors. 2020, Springer International Publishing: Cham. p. 1-9.
